# Supplementary material for: A Suggestion of Converting Protein Intrinsic Disorder to Structural Entropy Using Shannon’s Information Theory
Source: MDPI journal article supplement (doi:10.3390/e21060591), 2019-06-14
Supplement: s1 [file s1]

# A Suggestion of Converting Protein Intrinsic Disorder to Structural Entropy using Shannon's Information Theory

Hao-Bo Guo <sup>1,\*</sup>, Yue Ma <sup>2</sup>, Gerald A. Taskan <sup>3</sup>, Hong Qin <sup>1,4</sup>, Xiaohan Yang <sup>2,3,\*</sup> and Hong Guo <sup>2,\*</sup>

<sup>1</sup> Department of Computer Science and Engineering, SimCenter, University of Tennessee, Chattanooga, TN 37403, USA; hong-qin@utc.edu

<sup>2</sup> Department of Biochemistry and Cellular and Molecular Biology, University of Tennessee, Knoxville, TN 37996, USA; yma27@vols.utk.edu

<sup>3</sup> Biosciences Division, Oak Ridge National Laboratory, Oak Ridge, TN 37831, USA; tuskanga@ornl.gov

<sup>4</sup> Department of Biology, Geology, and Environmental Science, University of Tennessee, Chattanooga, TN 37403, USA

\* Correspondence: haobo-guo03@utc.edu (H.-B.G.); yangx@ornl.gov (X.Y.); hguo1@utk.edu (H.G.)

Figure S1. Profile of structural entropy of the residues in the giant human *Titin* protein ( $C = 34350$ ). Appendix, on the derivation of the equations that convert the disorder contents to the probabilities of states (with Figures S2 and S3)

Figure S4. The exponential, gamma, and power law fittings to the structural capacities of the human and JCVI-Syn3.0 proteomes

Table S1. Summaries of the exponential, gamma, and power law fittings of the protein structural capacities of the proteomes studied in this paper

List of 25 selenoproteins in human (*H. sapiens*) proteome, whose disorder contents cannot be predicted by PONDR

List of 8 information-rich proteins from DisProt database (v7.0) and their sequences

Table S2. X-ray structures from PDB with resolutions  $< 1.5 \text{ \AA}$ ,  $R = \infty$  (fully disordered) and  $C > 20$  in sequences

Table S3. X-ray structures from PDB with resolutions  $> 3.0 \text{ \AA}$ ,  $R = \infty$  (fully disordered) and  $C > 20$  in sequences

Figure S5. Distribution of proteins in the  $CR$ -space from 500 randomly built protein sequences with capacity randomly chosen in the range  $[50, 800]$ .  $\Sigma H/\Sigma I$  ratio is 1.020 from this random set. The vertical dashed line represents the median capacity of 417 from *H. sapiens* proteome, and the horizontal dashed line is at  $R = 1$ .

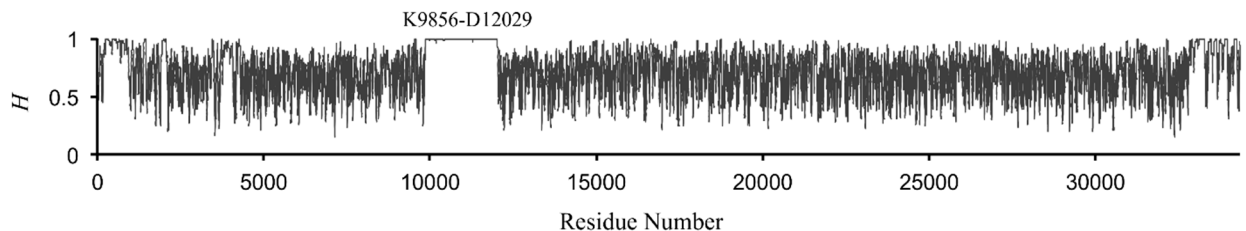

**Figure 1.** Profile of the structural entropy of the residues in the giant Human *Titin* protein ( $C = 34350$ ). Residues K9856 to D12029 (2174 AA) are a long intrinsically disordered region (IDR) with  $H > 0.95$  for all residues. The composition of residues in this IDR is C: 0, N: 0, A: 129, G: 16, L: 53, I: 87, M: 11, V: 331, F: 24, W: 3, S: 35, T: 55, Y: 32, Q: 28, K: 345, R: 64, H: 17, P: 456, D: 13, and E: 475. This region is abundant of disorder-promoting residues including 914 charged residues (K, R, H, D and E) and 456 P.

## Appendix

In the present paper the protein intrinsic disorder contents at the residue level are used to quantify the structural entropy and information. The quantities obtained therefore is also limited at the residue level, despite that more sophisticated methods might be able to tackle the structural information at higher (such as atomic and electronic) levels.

The Shannon equation[17] (eq. 1) might be a reasonable choice in studying the structural entropy of a protein since its structure can be viewed as a linear sequence of amino acids linked by peptide bonds. The function  $H$  of the Shannon entropy is statistical and derived from the state probabilities ( $p_i$  for the  $i$ -th state,  $i = 1, \dots, n$ , and  $n$  is the number of total states) with three original criteria<sup>17</sup> that

1)  $H$  is continuous in  $p_i$ ; i.e.,  $p_i$  could be any value in range of  $[0, 1]$  given that  $\sum p_i = 1$ ;  
2)  $H$  is a monotonic increasing function when all states are equally distributed with  $p_i = 1/n$ ; it should be noted that  $H$  achieves its maximal value of  $H_{max} = C = \log n$  in this situation, where  $C$  is the capacity;

3)  $H$  is additive, which is true for thermodynamic entropies, too. Shannon's definition came from the statistical considerations; i.e., when the choice of a state was split into two states, the original  $H$  should be weighted sum of the two individual values of  $H$ .

Here, for the structural entropy that concerns the intrinsic order or disorder of proteins, another criterion need be added, i.e.

4) A totally disordered residue contributes the structural entropy of 1, whereas a totally ordered residue contributes zero; the higher the disorder content, the higher the structural entropy a residue has.

Intuitively, criterion 4 fits the definition of both thermodynamic and information entropies. In the former, higher entropy corresponds to higher disorder, and in the latter entropy is synonymous to uncertainty. In both definitions the residues with higher disorder contents should have higher structural entropies. It had been proved[17] that the only  $H$  that satisfying criteria 1 to 3 is in the form of eq. 1, and therefore, to use this equation to estimate the structural entropy of a protein the disorder contents of all residues must be converted to probabilities of all states of the protein, in account of the criterion 4.

The disorder predictor gives a vector  $\mathbf{d} = (d_1, d_2, \dots, d_L)$  that scores the disorder content of each sequence of a protein with  $L$  residues. The score  $d_i$  of the  $i$ -th residue distributes in range of  $[0, 1]$  with 0 for fully ordered and 1 for fully disordered and that in between for a mixed state. However, considering the structural entropy and information we cannot even treat a single residue as a two-state system (i.e., 0 for the ordered and 1 for the disordered states) and apply eq. 1 such as

$$H(X) = -x \log_2 x - (1-x) \log_2 (1-x), \quad (S1)$$

where,  $x$  is the probability of the first (ordered) state and  $(1-x)$  of the second (disordered) state, of that residue. Eq. S1 symmetrically assigns equal contributions to entropy for both states that fits the criterion 2; however, it fails to meet the criterion 4. Instead, the ordered and disordered states should respectively have zero (0) and full (1) contributions, respectively. To fit the criterion 4, we may suppose an imaginary two-state system as shown in Fig. S3A. The two states termed  $\alpha$  ( $x = 0$ ) and  $\beta$  ( $x = 1$ ) contribute equally to the structural entropy and the entropy  $H(x)$  is zero at both extrema. The fully mixed state at  $x = 0.5$  has the maximal entropy of  $H(x) = 1$ , and this state should be regarded as the disordered state. Similarly, a three-state (or higher dimension) system may be supposed (Fig. S3B) with probabilities  $x_A$  for the  $\alpha$ -,  $x_B$  for the  $\beta$ - and  $x_C$  for the  $c$ -states, respectively, with  $\sum_{i=A,B,C} x_i = 1$ . The fully mixed state ( $x_i = 1/3$ ) has the maximal entropy of  $H = \log_2 3$ .

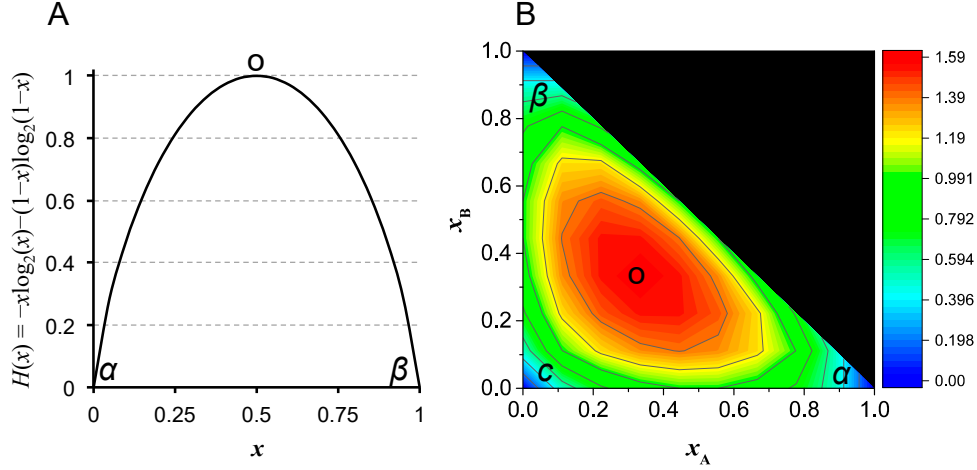

**Figure 2.** Profiles of Shannon function for (A) a two-state system; both  $\alpha$ - ( $x = 0$ ) and  $\beta$ -states ( $x = 1$ ) have zero entropies whereas the state with maximal entropy of 1.0 at  $x = (1-x) = 0.5$ ; (B) a three-state system. The 2D contour map is a projection onto the probability space of  $x_A$  and  $x_B$ ; the black region is inaccessible with total probabilities larger than 1. All extreme states have zero entropies and the mixed state at  $x_A = x_B = x_C = 1/3$  has the maximal entropy of  $\log_2 3 = 1.585$ .

Therefore, the criterion 4 shown above gives two alternative approaches for converting the disorder contents  $d$  to probabilities of states. In the first approach,  $d$  is directly used in the estimations, i.e.,

$$H(x_i) = d_i, \quad (\text{S2})$$

$d_i$  is the disorder content of the  $i$ -th residue. This approach (direct approach) is equivalent to a two-state approach and  $d_i$  automatically takes the value between 0 and 1, with 0 for the fully ordered and 1 for the fully disordered, fit well with criterion 4. However, a careful consideration of criterion 2 need be taken because the two extreme states (0 and 1) contribute unevenly to the entropy. Nevertheless, for a protein with  $L$  residues the maximal entropy or the capacity of the protein is  $H_{\max} = L$ , when all residues are in the fully disordered state, which is consistent with the total state number of  $2^L$  for the two-state system.

The second approach is based on Shannon's equation (Shannon-approach). Considering the two-state system in Fig. S3A, the  $\alpha$ - and  $\beta$ -states (the 0 and 1 states) could be regarded as two representative secondary structures. All mixed states between 0 and 1, therefore, have mixed secondary structural characteristics with the fully mixed state ( $x = 0.5$ ) having the maximal entropy of  $\log_2 2 = 1$ . The symmetry of Shannon's function (eq. S1) provides that both states contribute equally to the entropy, and therefore criterion 2 holds. In this approach, the disorder contents are converted to the probabilities of states using

$$H(X) = \sum_{i=1}^L -x_i \log_2 x_i - (1 - x_i) \log_2 (1 - x_i),$$

$$x_i = d_i/2. \quad (\text{S3})$$

In both approaches the capacity  $C$ , or the maximal entropy  $H_{\max}$ , of the protein equals to the residue number  $L$ ; i.e., the total number of the states of the protein is  $n = 2^L$ . The difference between the two approaches is that the direct-approach gives a linear function of the disorder content (orange in Fig. S3) and the Shannon-approach is a half function of the Shannon's equation in Eq. S1 (green in Fig. S3). It should be noted from that the disorder contents might underestimate the structural entropies.

The Shannon-approach is adopted in the main text. It should be noted from Fig. S3 that an alternative approach could be derived from the secondary structure predictions either use a two-state or three-state system or in higher dimensions. Moreover, this approach could be assisted by molecular dynamics (MD) simulations by providing an ensemble of configurations from which the probabilities of states could be extracted, which should be promising because the protein dynamics is involved.

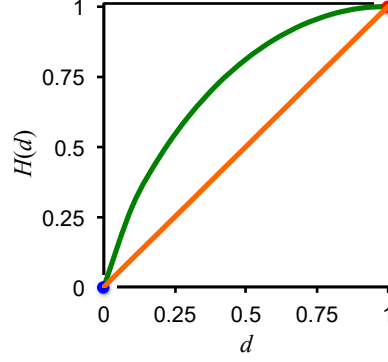

**Figure 3.** The structural entropy  $H(d)$  in function of the intrinsic disorder  $d$ . The orange line is from the direct-approach and the green line is from the Shannon-approach. Blue dot stands for the fully ordered state and red dot for the fully disordered state. Both profiles are based on two-state systems. In the direct-approach the two extreme states do not contribute equally to the entropy with the ordered state has entropy of 0 and disordered state has entropy of 1, respectively. In the Shannon-approach the fully ordered state could be served as either of two extreme states with entropies of 0, whereas the fully disordered state with entropy of 1 is the equally mixed state of both extreme states.

The exponential model with  $L = Ae^{bx}$ , gamma model with  $L = \Gamma^{-1}(x/(n+1); \alpha, \beta)$ , and power law model with  $L = Ax^b$  have been used to fit the protein length  $L$  in the proteomes. Here  $x$  is the serial number of the protein in the hierarchical rank and  $n$  is the total number of proteins in the proteome.  $A$  and  $b$  are the frequency factors and exponential indexes in the exponential and power law models. The inverse gamma function was applied in the gamma model and the parameters  $\alpha$  and  $\beta$  are calculated via

$$\alpha = (\sum_{i=1}^n L_i)^2 / [n \sum_{i=1}^n L_i^2 - (\sum_{i=1}^n L_i)^2],$$

$$\beta = n \sum_{i=1}^n L_i^2 / (n-1) \sum_{i=1}^n L_i. \quad (S4)$$

The coefficient of determination,  $R^2$ , was calculated using the standard procedure of

$$R^2 = 1 - \sum_{i=1}^n e_i^2 / \sum_{i=1}^n (L_i - \bar{L})^2, \quad (S5)$$

where,  $e_i = f_i - L_i$  is the error for the  $i^{\text{th}}$  protein, and  $\bar{L}$  is the average protein length of the proteome.

Figure S4 shows examples from the human (*H. sapiens*) and bacterial (*JCVI-Syn3.0*) proteomes. The fitting results of all proteomes assessed in the present work are summarized in Table S1. In all cases, the exponential model yield fittings with coefficient  $R^2$  larger than 0.9; the gamma model gives good fittings except for the two animal models surveyed here. The power law model did fit well at the short- $L$  side but had relatively large deviations at the long- $L$  side. We may therefore use the exponential model for the fitting of all proteomes.

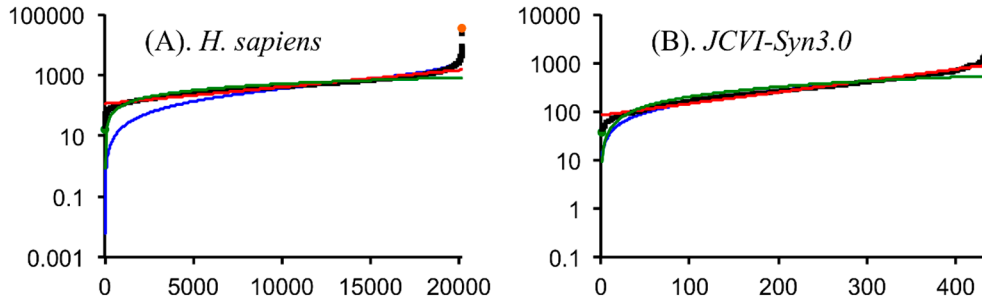

**Figure 4.** Distribution of protein length  $L$  from (A) *H. sapiens* (human) and (B) *JCVI-Syn3.0* proteomes ranked in a hierarchical order (black dots) fitted with exponential (red), gamma (blue) and power law (green) models. The horizontal axis is the serious number of the proteins hierarchically ranked by the structural capacity, and the vertical length represents the structural capacity of the proteins. The proteins with largest and smallest structural capacities are shown in orange and green dot, respectively.

**Table 1.** Fitting of the structural capacity  $L$  using different models.

| Species                | Exponential <sup>a</sup> |        |       | Power law <sup>a</sup> |       |       | Gamma    |         |       |
|------------------------|--------------------------|--------|-------|------------------------|-------|-------|----------|---------|-------|
|                        | $A$                      | $b$    | $R^2$ | $A$                    | $b$   | $R^2$ | $\alpha$ | $\beta$ | $R^2$ |
| <i>H. sapiens</i>      | 113.7                    | 1.3E-4 | 0.939 | 0.844                  | 0.695 | 0.814 | 0.858    | 654.2   | 0.792 |
| <i>D. melanogaster</i> | 94.8                     | 2.0E-4 | 0.946 | 0.628                  | 0.752 | 0.826 | 0.768    | 699.9   | 0.804 |
| <i>S. cerevisiae</i>   | 102.9                    | 4.4E-4 | 0.934 | 1.347                  | 0.733 | 0.888 | 1.664    | 296.9   | 0.983 |
| <i>A. thaliana</i>     | 88.0                     | 9.0E-5 | 0.933 | 0.419                  | 0.718 | 0.893 | 1.779    | 227.8   | 0.968 |
| <i>O. sativa</i>       | 70.5                     | 6.0E-5 | 0.969 | 0.206                  | 0.735 | 0.837 | 1.418    | 265.3   | 0.986 |
| <i>A. trichopoda</i>   | 59.8                     | 1.0E-4 | 0.980 | 0.497                  | 0.668 | 0.723 | 1.153    | 275.0   | 0.971 |
| <i>P. patens</i>       | 46.1                     | 1.0E-4 | 0.986 | 0.092                  | 0.835 | 0.788 | 1.005    | 350.3   | 0.977 |
| <i>Lokiarchaeum</i>    | 55.7                     | 4.8E-4 | 0.959 | 0.929                  | 0.710 | 0.854 | 1.517    | 177.0   | 0.939 |
| <i>I. hospitalis</i>   | 80.0                     | 1.5E-3 | 0.961 | 6.251                  | 0.575 | 0.834 | 2.329    | 119.5   | 0.981 |
| <i>N. equitans</i>     | 77.5                     | 4.0E-3 | 0.961 | 10.231                 | 0.586 | 0.811 | 1.895    | 147.8   | 0.940 |
| <i>JCVI-Syn3.0</i>     | 84.2                     | 5.5E-3 | 0.961 | 9.273                  | 0.669 | 0.850 | 1.828    | 194.8   | 0.982 |
| <i>Rickettsia</i>      | 72.9                     | 1.3E-3 | 0.966 | 3.987                  | 0.630 | 0.809 | 1.681    | 179.6   | 0.969 |
| <i>S. elongatus</i>    | 79.8                     | 9.0E-4 | 0.957 | 3.445                  | 0.622 | 0.857 | 2.184    | 139.8   | 0.991 |
| <i>Mimivirus</i>       | 81.4                     | 2.5E-3 | 0.933 | 4.753                  | 0.690 | 0.865 | 1.536    | 232.3   | 0.946 |
| <i>Pandoravirus</i>    | 39.1                     | 1.2E-3 | 0.990 | 0.792                  | 0.793 | 0.793 | 1.271    | 203.9   | 0.980 |

<sup>a</sup> The functions used for the three models are shown above. For both the exponential and power law models  $A$  is the frequency factor (or pre-exponential factor) and  $b$  is the exponential index.

#### List of 25 selenoproteins in human (*H. sapiens*) proteome, whose disorder contents cannot be predicted by PONDR

sp|Q99611|SPS2\_HUMAN  
 sp|Q9BQE4|SELS\_HUMAN  
 sp|P49908|SEPP1\_HUMAN  
 sp|P59797|SELV\_HUMAN  
 sp|Q8IZQ5|SELI\_HUMAN  
 sp|Q9Y6D0|SELK\_HUMAN  
 sp|P63302|SELI\_HUMAN  
 sp|O60613|SEPI5\_HUMAN  
 sp|Q9BVL4|SELO\_HUMAN  
 sp|Q9NZV5|SELN\_HUMAN  
 sp|P62341|SELT\_HUMAN  
 sp|Q8WWX9|SELM\_HUMAN  
 sp|P02729|GLUR\_HUMAN  
 sp|Q92813|IOD2\_HUMAN  
 sp|P55073|IOD3\_HUMAN  
 sp|P18283|GPX2\_HUMAN  
 sp|P07203|GPX1\_HUMAN  
 sp|P59796|GPX6\_HUMAN  
 sp|P22352|GPX3\_HUMAN  
 sp|P49895|IOD1\_HUMAN  
 sp|Q16881|TRXR1\_HUMAN  
 sp|Q86VQ6|TRXR3\_HUMAN  
 sp|Q9NNW7|TRXR2\_HUMAN  
 sp|Q9C0D9|EPT1\_HUMAN  
 sp|Q9NZV6|MSRB1\_HUMAN

#### List of 8 information-rich ( $R < 1$ ) proteins from DisProt database (v7.0) and their sequences

| Gene    | Capacity | Entropy | Info    | logC  | R     |
|---------|----------|---------|---------|-------|-------|
| DP00851 | 256.000  | 84.528  | 171.472 | 8.000 | 0.493 |
| DP00088 | 663.000  | 231.965 | 431.035 | 9.373 | 0.538 |

|         |         |         |         |       |       |
|---------|---------|---------|---------|-------|-------|
| DP00925 | 277.000 | 109.069 | 167.931 | 8.114 | 0.649 |
| DP00271 | 348.000 | 142.439 | 205.561 | 8.443 | 0.693 |
| DP00927 | 274.000 | 122.846 | 151.154 | 8.098 | 0.813 |
| DP00974 | 398.000 | 188.842 | 209.158 | 8.637 | 0.903 |
| DP00801 | 52.000  | 24.706  | 27.294  | 5.700 | 0.905 |
| DP00509 | 86.000  | 42.265  | 43.735  | 6.426 | 0.966 |

>DP00851

MSVTTETTAGAAAGSDAIVDLRGMWVGAVGLNIFYLVIRIYEQIYGWRAGLDSEFAPEFQTYWLSILWTEIPLE  
LVSGLALAGWLWKTRDRNVDVAVPREELRRHVVLVEWLVVYAVAIYWGASFFTEQDGTWHMTVIRDITDF  
TPSHIIIEFYMSYPIYSIMAVGAFFYAKTRIPYFAHGFSLAFLIVAIGPFMIIPNVGLNEWGHTFWFMEELFVAPL  
HWGFVFFGWMALGVFGVVLQILMGVKRLIGKDCVAALVG

>DP00088

MFGKLSLDAVPFHEPIVMVTIAGIILGGLALVGLITYFGKWTYLWKEWLTSVDHKRLGIMYIIVAIVMLLRGF  
ADAIMMRSQQALASAGEAGFLPPHHYDQIFTAHGVIMIFFVAMPFVIGLMNLVVPLQIGARDVAFPLNNLS  
FWFTVVGVLVNVSLGVGEFAQTGWLAYPPLSGIEYSPGVGVVYWIWSLQLSGIGTTLTGINFFVTILKMRAP  
GMTMFKMPVFTWASLCANVLIIASFPILTVTVALLTLDRLGTHFFTNMGGNMMMYINLIWAWGHPEVYI  
LILPVFGVFSEIAATFSRKRLFGYTSLVWATVCITVLSFIVWLHHFFTMGAGANVNAFFGITTMIIAIPTGVKIFN  
WLFTMYQGRIVFHSAMLWTIGFIVTFSVGGMTGVLLAVPGADFLHNSLFLIAHFHNVIIGGVVFGCFAGMT  
YWWPKAFGFKLNETWGKRAFWFIIIGFFVAFMPLYALGFMGMTRRLSQIDPQFHTMLMIAASGAVLIAL  
GILCLVIQMYVSIRDRDQNRDLTGDPWGGRTLEWATSSPPPFYNFAVVPVHERDAFWEMKEKGEAYKKP  
DHYEEIHMPKNSGAGIVIAAFSTIFGFAMIWHIWWLAIVGFAGMIITWIVKSFDEDEDVYYVPVAEIEKLENQH  
FDEITKAGLKNGN

>DP00925

MQKQSLLIHFSKKIVSHRYFTRIITLILFNALLVGLETYPALRHEYGSLFHVLDVILLWIFTLEILTRFLATTPKK  
DFFKGGWNWFDTIIVLSSHIFVGGHFITVLRILRVLRLRAISVIPSLRRLVDALMLTIPALGNILILMSIIFYFAV  
LGTMLFANVAPEYFANLQLSMLTLFQIVTLDSWGSVMRPIVLDIPWAWTYFIAFVLVGTFIIFNLFIGVIVNN  
VEKANEDVKDKVKEKEEAAQKQMDSLHEELKEIKQYLSIEKQNRSS

>DP00271

MNGTEGPNFYVPFSNKTGVVRSPFEAPQYYLAEPWQFSMLAAYMFLIMLGFPINFLTLYVTVQHKKLRTP  
NYILLNLAVADLFMVFGGFTTLYTSLHGYFVFGPTGCNLEGFATLGGELALWSLVLAIERVYVVVCKPMSN  
FRGENHAIMGVAFTWVMALACAAPPLVGWSRYIPEGMQCSCGIDYYTPHEETNNESFVIYMFVVHFIPLIV  
IFFCYGQLVFTVKEAAAQQQESATTQKAEKEVTRMVIIMVIAFLICWLPHYAGVAFYIFTHQGSDFGPIFMTIPA  
FFAKTSAVYNPVIYIMMNKQFRNCMVTTLCCGKNPLGDDEASTTVSKTETSQVAPA

>DP00927

MSRKIRDIESKRFQNVITAIIVLNGAVLGLLTDTTSLASSQNLLERVDQLCLTIFIVEISLKIYAYGVRGFFRSG  
WNLDFDVIVAIALMPAQGSLSVLRTRIFRVMRLVSVIPTMRRVVQGMLLALPGVGSVAALLTVVFYIAAVM  
ATNLYGATFPEWFGDLSKSLYTLFQVMTLESWSMGIVRPMNVHPNAWVFFIPFIMLTFTVLNLFIGIIVDA  
MAITKEQEEAAKTGHHQEPISTLLHLGDRLDRIEKQLAQNNELLQRQQPQKK

>DP00974

MDSSAGPNISDCSDPLAPASCSPAPGSWLNLSHVDGNQSDPCGPNRTGLGGSHSLCPQTGSPSMVTAITIM  
ALYSIVCVVGLFGNLFVYVIVRYTKMKTATNIYIFNLALADALATSTLPFQSVNYLMGTWPFGNILCKIVISI  
DYNNMFTSIFTLCTMSVDRIYAVCHPVKALDFRTPRNAKIVNVCNWILSSAIGLPVMFMATTKYRQGSIDCTL  
TFSHPTWYWENLLKICVFIFAFIMPVLIITVCYGLMILRLKSVMRLSGSKEKDRNLRRITRMVLVVAVFIVCW  
TPIHIYVIKALITIPETTFQTVSWHFCIALGYTNSCLNPVLYAFLDENFKRCFREFCIPTSSSTIEQQNSARIRQNT  
REHPSTANTVDRTNHQLENLEAETAPLP

>DP00801

MDKVQYLTRSAIRRASTIEMPQQARQNLQNLFINFCLILICLLICIIVMLL

>DP00509

MIPAVVLLLLLVEQAAALGEPQLCYILDAILYGIVLTLLYCRLKIQVRKAAITSYEKSDGVYTGLSTRNQET  
YETLKHEKPPQ

**Table 2.** X-ray structures from PDB with resolutions  $< 1.5 \text{ \AA}$ ,  $R = \infty$  (fully disordered) and  $C > 20$  in sequences <sup>a</sup>.

| PDB ID:chain ID | Resolution ( $\text{\AA}$ ) | Description            | C  | Oligomeric state |
|-----------------|-----------------------------|------------------------|----|------------------|
| 1JCD:A          | 1.3                         | Ala-zipper             | 52 | Homo-trimer      |
| 1K6F:A          | 1.3                         | Collagen triple helix  | 30 | Homo-trimer      |
| 1RJU:V          | 1.44                        | Yeast copper tionein   | 36 | Monomer          |
| 1X1K:A          | 1.1                         | Host-guest peptide     | 27 | Homo-trimer      |
| 2V8F:C          | 1.1                         | Profilin-actin complex | 21 | Monomer          |
| 3B0S:A          | 1.45                        | Collagen model         | 27 | Homo-trimer      |
| 3IPN:A          | 1.21                        | Modified collagen      | 21 | Homo-trimer      |
| 3WN8:A          | 1.45                        | Collagen model         | 24 | Homo-trimer      |
| 4GYX:A          | 1.49                        | Type-III collage       | 31 | Homo-trimer      |
| 4OY5:A          | 0.89                        | Collagen model         | 30 | Homo-trimer      |

a. For identical entries only a unique sequence was chosen for analysis in present work.

**Table 3.** X-ray structures from PDB with resolutions  $\geq 3.0 \text{ \AA}$ ,  $R = \infty$  (fully disordered) and  $C > 20$  in sequences <sup>a</sup>.

| PDB ID:chain ID     | Resolution ( $\text{\AA}$ ) | Description                        | C  | Oligomeric state |
|---------------------|-----------------------------|------------------------------------|----|------------------|
| 2F6A:E              | 3.29                        | Collagen complex                   | 30 | Homer-trimer     |
| 2V53:B <sup>b</sup> | 3.2                         | SPARC-collagen complex             | 33 | Homo-trimer      |
| 3U85:B <sup>b</sup> | 3.0                         | Human menin in complex with MLL1   | 36 | Monomer          |
| 4AUO:C              | 3.0                         | MMP-1 in complex with collagen     | 40 | Homo-trimer      |
| 4BJ3:C              | 3.042                       | Integrin alpha2 I-collagen complex | 21 | Homo-trimer      |
| 4BKL:E              | 3.25                        | Triple-helical J1 peptide          | 37 | Homo-trimer      |
| 4FQ3:B <sup>b</sup> | 3.0                         | Transportin/FUS-NLS                | 37 | Monomer          |
| 4GU0:E <sup>b</sup> | 3.103                       | LSD2 with H3                       | 26 | Monomer          |
| 4GWQ:H              | 4.5                         | RNA Pol-II subunit                 | 35 | Monomer          |
| 4HTV:B              | 3.0                         | BFDV Cap NLS peptide complex       | 29 | Monomer          |
| 5JXT:Q              | 3.009                       | MtISWI bound with histone H4 tail  | 21 | Monomer          |
| 5MUB:E              | 3.1                         | ACC1 Fab in complex with CG05      | 33 | Monomer          |
| 6F5P:G              | 4.14                        | Influenza virus transcriptase unit | 28 | Monomer          |

a. For identical entries only a unique sequence was chosen for analysis in present work. b. Entry collected in the IDEAL[36] database.

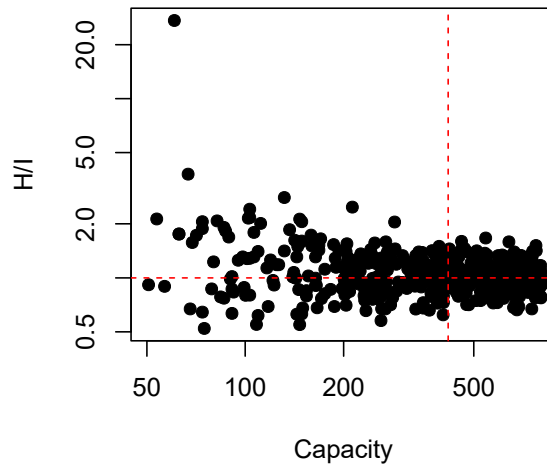

**Figure 5.** Distribution of proteins in the CR-space from 500 randomly built protein sequences with capacity randomly chosen in the range  $[50, 800]$ .  $\Delta H:\Delta I$  ratio is 1.020 from this random set. The vertical dashed line represents the median capacity of 417 from *H. sapiens* proteome and the horizontal dashed line is at  $R = 1$ .
